# Supplementary material for: Four Weeks Treatment with Glecaprevir/Pibrentasvir + Ribavirin—A Randomized Controlled Clinical Trial
Source: MDPI journal article supplement (doi:10.3390/v14030614), 2022-03-16
Supplement: s1 [file s1]

**Supplemental Table S1 – Data Collection.** Study procedure as outlines in tables below.

Table S1a:

| <b>Assessments and procedures</b>          | <b>Screening Week<sup>h</sup><br/>-12-0</b> | <b>Start<sup>h</sup></b> | <b>Day 14<sup>h</sup><br/>(+/- 3 day)</b> | <b>Day 28<sup>f</sup>(EOT for 4 weeks treatment) (+/- 2day)</b> | <b>Day 56<sup>g</sup><br/>(EOT for 8 weeks treatment) (+/-2day)</b> | <b>Week 4 Post treatment (-1 /+14 days)</b> | <b>Week 12<sup>h,i</sup><br/>Post treatment (-1 /+14 days)</b> | <b>Week 24 Post treatment (-1 /+14 days)</b> | <b>Week 48<sup>h,i</sup><br/>Post treatment (-1 /+14 days)</b> |
|--------------------------------------------|---------------------------------------------|--------------------------|-------------------------------------------|-----------------------------------------------------------------|---------------------------------------------------------------------|---------------------------------------------|----------------------------------------------------------------|----------------------------------------------|----------------------------------------------------------------|
| <b>Informed Consent</b>                    | x                                           |                          |                                           |                                                                 |                                                                     |                                             |                                                                |                                              |                                                                |
| <b>Medical history</b>                     | x                                           |                          |                                           |                                                                 |                                                                     |                                             |                                                                |                                              |                                                                |
| <b>Review of medication</b>                | x                                           | x                        | x                                         | x                                                               | x                                                                   | x                                           | x                                                              |                                              |                                                                |
| <b>Physical Examination <sup>a)</sup></b>  | x                                           | (x)                      | (x)                                       | (x)                                                             | (x)                                                                 | (x)                                         | (x)                                                            | (x)                                          | (x)                                                            |
| <b>Adverse events</b>                      |                                             | x                        | x                                         | x                                                               | x                                                                   | x                                           | x                                                              |                                              |                                                                |
| <b>FibroScan<sup>b)</sup></b>              | x <sup>a</sup>                              |                          |                                           |                                                                 |                                                                     |                                             |                                                                |                                              |                                                                |
| <b>Height</b>                              | x                                           |                          |                                           |                                                                 |                                                                     |                                             |                                                                |                                              |                                                                |
| <b>Weight<sup>(c)</sup></b>                | x                                           | x                        | x                                         | x                                                               | x                                                                   | x                                           | x                                                              | x                                            | x                                                              |
| <b>ECG <sup>b)</sup></b>                   | x                                           |                          |                                           |                                                                 |                                                                     |                                             |                                                                |                                              |                                                                |
| <b>Vital signs <sup>d)</sup></b>           | x                                           | x                        | x                                         | x                                                               | x                                                                   | x                                           | x                                                              | x                                            | x                                                              |
| <b>Questionnaires <sup>e</sup></b>         | x                                           |                          |                                           | x                                                               | x                                                                   | x                                           | x                                                              | x                                            | x                                                              |
| <b>Compliance interview and pill count</b> |                                             |                          | x                                         | x                                                               | x                                                                   |                                             |                                                                |                                              |                                                                |

a) Full examination as defined in the e-CRF at screening – afterwards only if symptoms present or as follow-up of existing findings

b) ECG and/or FibroScan less than 3 month old available in the subjects electronic or paper record accepted.

c) Includes abdominal circumference

d) Blood pressure, pulse

e) SF-36, the Fatigue severity scale (FSS) and the insomnia severity index(ISI)

f) Only for 4 weeks treatment

g) Only for 8 weeks treatment

h) Compulsory study visit.

i) Blood samples, as minimum is required.

Abbreviations: end of treatment (EOT)

Table S1b

| Tests                                                            | Screening<br>Week<br>12-0 | Start <sup>j</sup> | Day 14 <sup>k</sup> | Day 28 <sup>k</sup><br>(EOT) | Day<br>56 <sup>k</sup> (EOT 8<br>weeks<br>treatment) | Week 4<br>Post<br>treatment | Week 12 <sup>l</sup><br>Post<br>treatment | Week 24<br>Post<br>treatment | Week 48 <sup>l</sup><br>Post<br>treatment |
|------------------------------------------------------------------|---------------------------|--------------------|---------------------|------------------------------|------------------------------------------------------|-----------------------------|-------------------------------------------|------------------------------|-------------------------------------------|
| HCV-RNA                                                          | X                         | x                  | x                   | x                            | x                                                    | x                           | x                                         | x                            | x                                         |
| HCV genotype                                                     | X                         |                    |                     |                              |                                                      | (x) if<br>detectable        | (x) if<br>detectable                      | (x) if<br>detectable         | (x) if<br>detectable                      |
| Anti HAV IgM,<br>HbsAg, antiHbc,<br>Anti HIVa <sup>a</sup>       | X                         |                    |                     |                              |                                                      |                             |                                           |                              |                                           |
| IL 28b genotype <sup>b</sup>                                     | X                         |                    |                     |                              |                                                      |                             |                                           |                              |                                           |
| Haematology <sup>c</sup>                                         | X                         | x                  | x                   | x                            | x                                                    | x                           | x                                         | x                            | x                                         |
| Renal function <sup>d</sup>                                      | X                         | x                  | x                   | x                            | x                                                    | x                           | x                                         | x                            | x                                         |
| Liver function <sup>e</sup>                                      | X                         | x                  | x                   | x                            | x                                                    | x                           | x                                         | x                            | x                                         |
| Immunoglobulins                                                  | X                         |                    |                     |                              |                                                      |                             |                                           |                              |                                           |
| Pregnancy test <sup>f</sup>                                      | X                         | x                  |                     |                              |                                                      |                             | x                                         | x                            |                                           |
| Thyroid function <sup>g</sup>                                    | X                         |                    |                     |                              |                                                      |                             |                                           |                              |                                           |
| Backup/archive <sup>h</sup>                                      | x (10ml)                  | x(10)ml            | x(10)ml             | x(15ml) <sup>i</sup>         | x(15ml)                                              | x(10ml)                     | x(10ml)                                   | x(10ml)                      | x(10ml)                                   |
| Cell archive <sup>i</sup>                                        |                           | x(10)ml            | x(10)ml             | x(10)ml                      | X(10ml)                                              | x(10)ml                     | x(10)ml                                   | x(10)ml                      |                                           |
| Approximate<br>volume in<br>milliliter blood<br>Max total 400 ml | 55-70                     | 45                 | 55                  | 60                           | 60                                                   | 45                          | 50                                        | 50                           | 35                                        |

a) Only if new risk behavior, or not documented within five years

b) Only if not documented in medical record

c) Hemoglobin, leucocytes , platelets,

d) Sodium, potassium, creatinin, estimated GFR, albumine

e) ALT, AST, bilirubin, GGT, ALP, INR, Gammaglutamyl-transferase, laktat dehydrogenase

f) All females – serum or urine HCG. Should be taken at treatment start and post treatment week 12 and 48.

g) TSH (workup)

h) Archive sample will be separated and stored locally at -80°

i) Only for participants in phase 1

j) Will only be taken if it is more than 3 months since screening samples were taken.

- k) *Blood test can be omitted if no signs or suspicion of moderate or severe side effects.*
- l) *Can be replaced by dried blood spot.*

Abbreviations: Hepatitis A virus (HAV), Hepatitis B surface antigen (HbsAg), antibody to Hepatitis B core antigen (antiHbc ), antibodies to human immunodeficiency virus (anti HIV), glomerular filtration rate (GFR), alanine aminotransferase (ALT), Aspartate aminotransferase (AST), alkaline phosphatase (ALP), International normalized ratio (INR), human chorionic gonadotropin (HCG) , thyroid stimulating hormone (TSH)

Supplemental Table S2

Table S2: Baseline characteristics from phase 1 +2 of the total modified intention-to-treat-population for patients treated for 4 weeks with GLE/PIB + ribavirin.

| <b>Study population, n</b>                        | <b>4 week<br/>Glecaprevir/Pibrentasvir + Ribavirin (27)</b> |
|---------------------------------------------------|-------------------------------------------------------------|
| Age (years) median (IQR)                          | 43 (39-45)                                                  |
| Male, (%)                                         | 20 (74.1)                                                   |
| BMI, median (IQR)                                 | 25.9 (23.1-27.1)<br>(n=25)                                  |
| Current or past alcohol<br>overuse, (%)           | 16 (59.3)                                                   |
| Current or past intravenous<br>drug use           | 24 (88.9)                                                   |
| HCV Genotype                                      |                                                             |
| 1a                                                | 10                                                          |
| 1b                                                | 2                                                           |
| 2                                                 | 3                                                           |
| 3                                                 | 11                                                          |
| 4                                                 | 1                                                           |
| HCV RNA (log <sub>10</sub> IU/ml) median<br>(IQR) | 6.3 (5.6-6.8)                                               |
| INFL 3 genotype                                   |                                                             |
| CC                                                | 6                                                           |

|                                      |                      |
|--------------------------------------|----------------------|
| Non CC                               | 20                   |
| Missing                              | 1                    |
| LSM in kPa, median (range)           | 5.6 (4.6-6.9)        |
| Opioid agonist therapy               | 14 (51.9)            |
| Methadone                            | 11 (40.7)            |
| Buprenorphine                        | 3 (11.1)             |
| Heroin (legal)                       | 3 (11.1)             |
| Year since infected, median<br>(IQR) | 22 (19-27)<br>(n=26) |

Abbreviations: Interquartile range (IQR), Body Mass Index (BMI), Interferon Lambda 3 (INFL3)

Liver stiffness measurement (LSM),

## Supplemental Table S3

Table S3. Univariate analysis for predictors in favor of SVR12 after 4 weeks treatment with GLE/PIB + ribavirin.

| Variables                               | Univariate        |         |
|-----------------------------------------|-------------------|---------|
|                                         | OR (95% CI)       | p-value |
| Age (years)                             | 1.02 (0.87-1.19)  | 0.811   |
| Age                                     |                   |         |
| <= 35                                   | 1.6 (0.14-18.00)  | 0.704   |
| >35                                     | 1 (ref)           |         |
| Sex                                     |                   |         |
| Female                                  | 1.35 (0.21-8.82)  | 0.757   |
| Male                                    | 1 (ref.)          |         |
| Genotype                                |                   |         |
| 3                                       | 10 (1.03-97.50)   | 0.048*  |
| Non 3                                   | 1 (ref.)          |         |
| BMI, median (IQR)                       |                   |         |
| >25                                     | 1.26 (0.25-6.36)  | 0.782   |
| <=25                                    | 1 (ref)           |         |
| Baseline viral load<br>Log10            | 0.13 (0.03-0.69)  | 0.016*  |
| Baseline viral load                     |                   |         |
| <=2000                                  | 28 (2.65-295.72)  | 0.006*  |
| >2000                                   | 1 (ref)           |         |
| Baseline viral load                     |                   |         |
| <=3000                                  | 4.38 (0.78-24.47) | 0.093   |
| >3000                                   | 1 (ref)           |         |
| Baseline ALT<br>Log10                   | 3.83 (0.67-21.83) | 0.130   |
| Current or past alcohol use             | 0.625 (0.12-3.32) | 0.581   |
| Current or past intravenous drug<br>use | 1.30 (0.08-12.76) | 1.000   |
| INFL3                                   |                   |         |
| CC                                      | 2.69 (0.26-27.82) | 0.406   |
| Non CC                                  | 1 (ref)           |         |

|                |                   |       |
|----------------|-------------------|-------|
| Infection time | 0.893 (0.77-1.04) | 0.138 |
|----------------|-------------------|-------|

Abbreviations: Odds ratio (OR), confidence interval (CI); Body Mass Index (BMI), alanine aminotransferase (ALT), Interferon Lambda 3 (INFL3). Statistically significant results marked with \*
